# Supplementary material for: Ergothioneine Production by Submerged Fermentation of a Medicinal Mushroom Panus conchatus
Source: MDPI journal article supplement (doi:10.3390/fermentation8090431), 2022-08-30
Supplement: s1 [file s1]

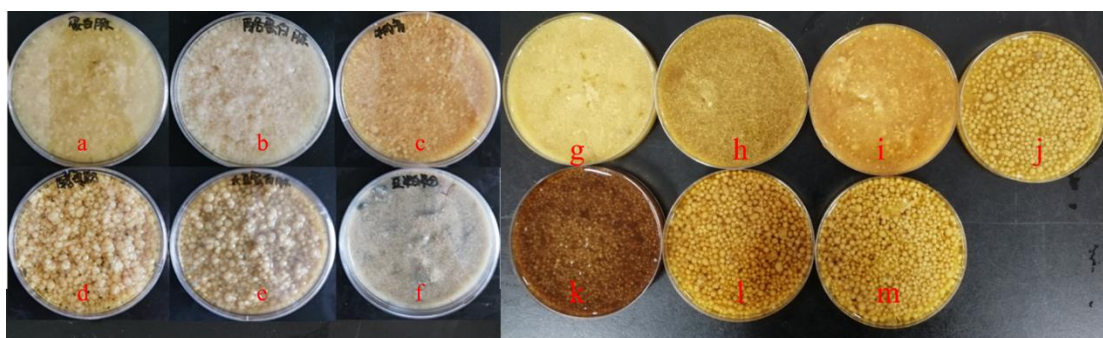

**Figure S1.** Effect of different medium on thallus morphology ((a) peptone, (b) casein peptone, (c) beef extract, (d) yeast powder, (e) soy peptone, (f) soybean meal powder, (g) glycerol, (h) glucose, (i) fructose, (j) dextrin, (k) molasses, (l) maltose, (m) sucrose).
